# Supplementary material for: Surface and Structural Characterization of PVTMS Films Treated by Elemental Fluorine in Liquid Perfluorodecalin
Source: MDPI journal article supplement (doi:10.3390/ma16030913), 2023-01-18
Supplement: s1 [file s1]

## Supplementary Materials

# Surface and Structural Characterization of PVTMS Films Treated by Elemental Fluorine in Liquid Perfluorodecalin

Nikolay A. Belov <sup>1,2,\*</sup>, Aleksandr Y. Alentiev <sup>1,2</sup>, Dmitrii S. Pashkevich <sup>1,3</sup>, Fedor A. Voroshilov <sup>1</sup>, Edgar S. Dvilis <sup>1</sup>, Igor P. Asanov <sup>4</sup>, Roman Y. Nikiforov <sup>1,2</sup>, Sergey V. Chirkov <sup>1,2</sup>, Daria A. Syrtsova <sup>2</sup>, Julia V. Kostina <sup>2</sup> and Yulia G. Bogdanova <sup>5</sup>

<sup>1</sup> Tomsk Polytechnic University, 30, Lenin Avenue, 634050 Tomsk, Russia

<sup>2</sup> A.V. Topchiev Institute of Petrochemical Synthesis, Russian Academy of Sciences, 29, Leninskii Prospect, 119991 Moscow, Russia

<sup>3</sup> Institute of Applied Mathematics and Mechanics, Peter the Great St. Petersburg Polytechnic University, 29, Polytechnicheskaya St., 195251 Petersburg, Russia

<sup>4</sup> A.V. Nikolaev Institute of Inorganic Chemistry, Siberian Branch of Russian Academy of Sciences, 3, Academician Lavrentiev St., 630090 Novosibirsk, Russia

<sup>5</sup> Chemical Department, M.V. Lomonosov Moscow State University, GSP-1, Leninskie Gory, 119991 Moscow, Russia

\* Correspondence: belov@ips.ac.ru; Tel.: +7-(926)-432-8323

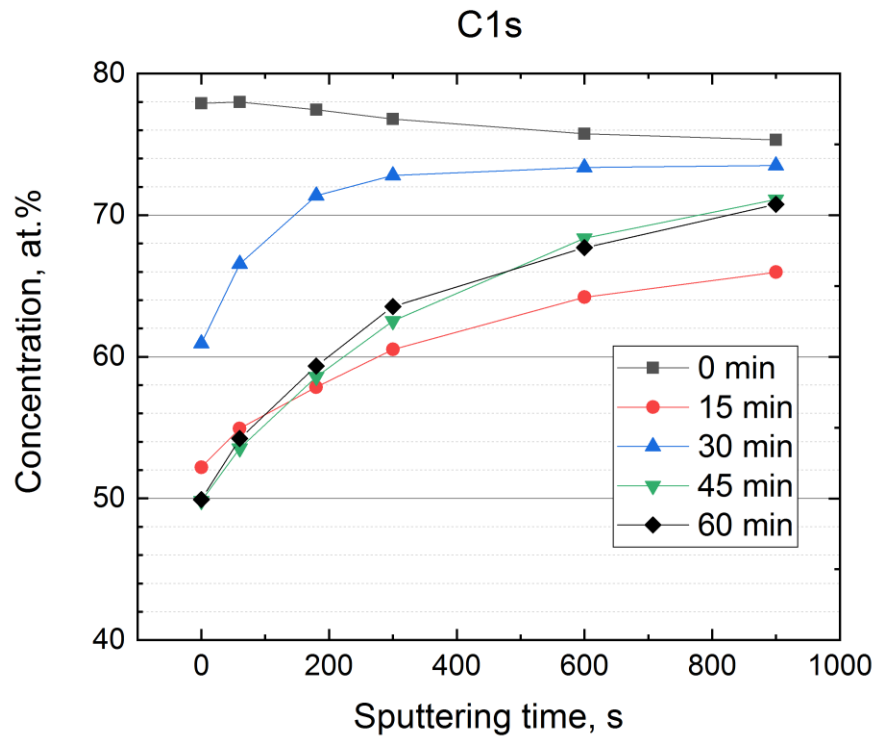

(a)

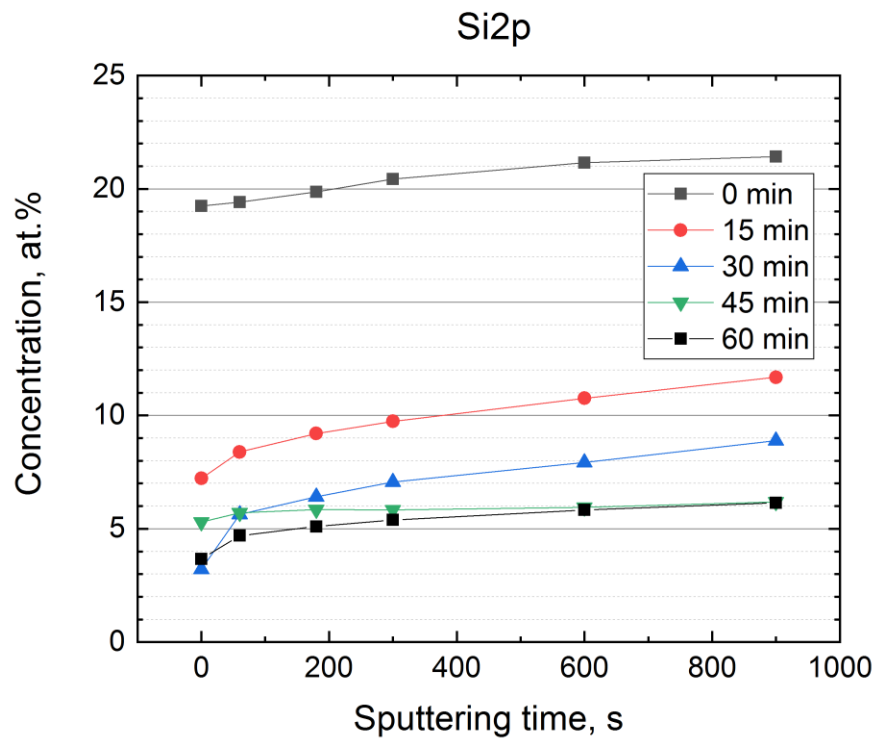

(b)

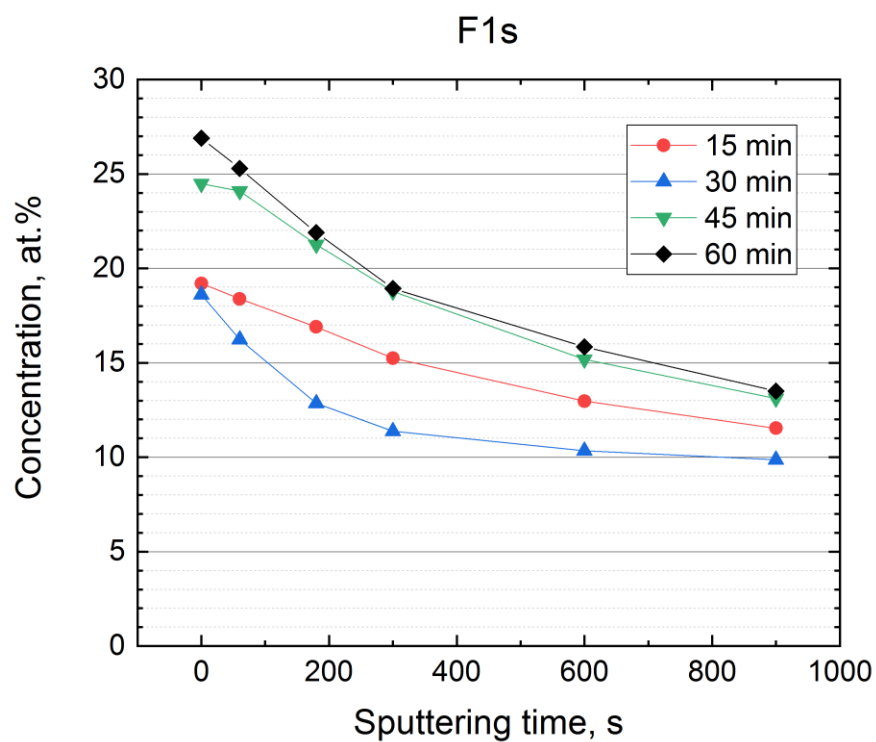

(c)

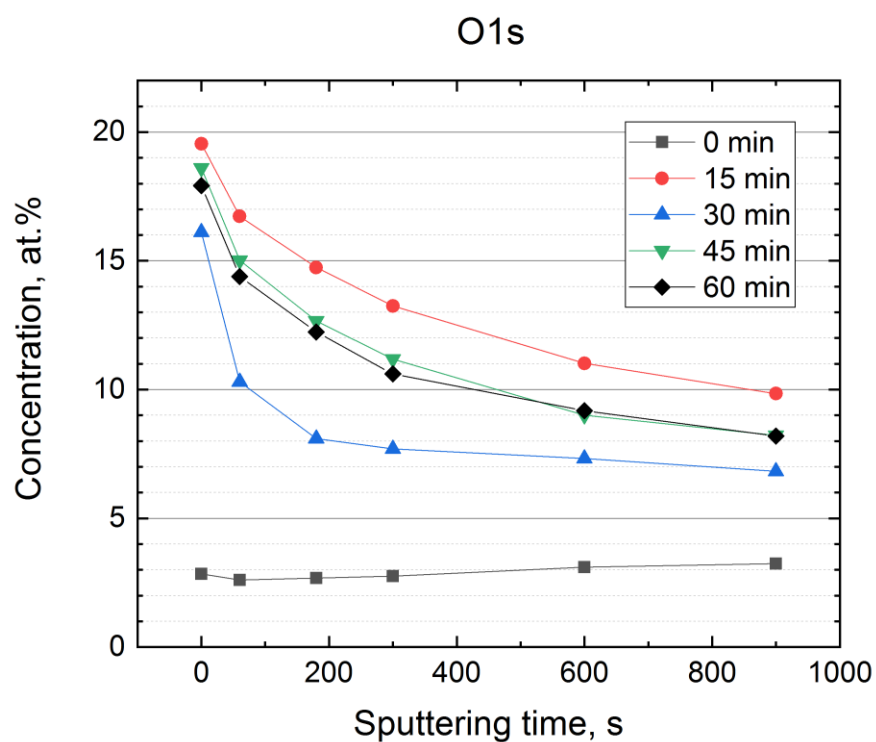

(d)

Figure S1. XPS spectra of C1s (a), Si2p (b) F1s (c) and O1s (d) lines for virgin PVTMS sample without and after  $\text{Ar}^+$  irradiation etching for 60, 180, 300, 600 and 900 s

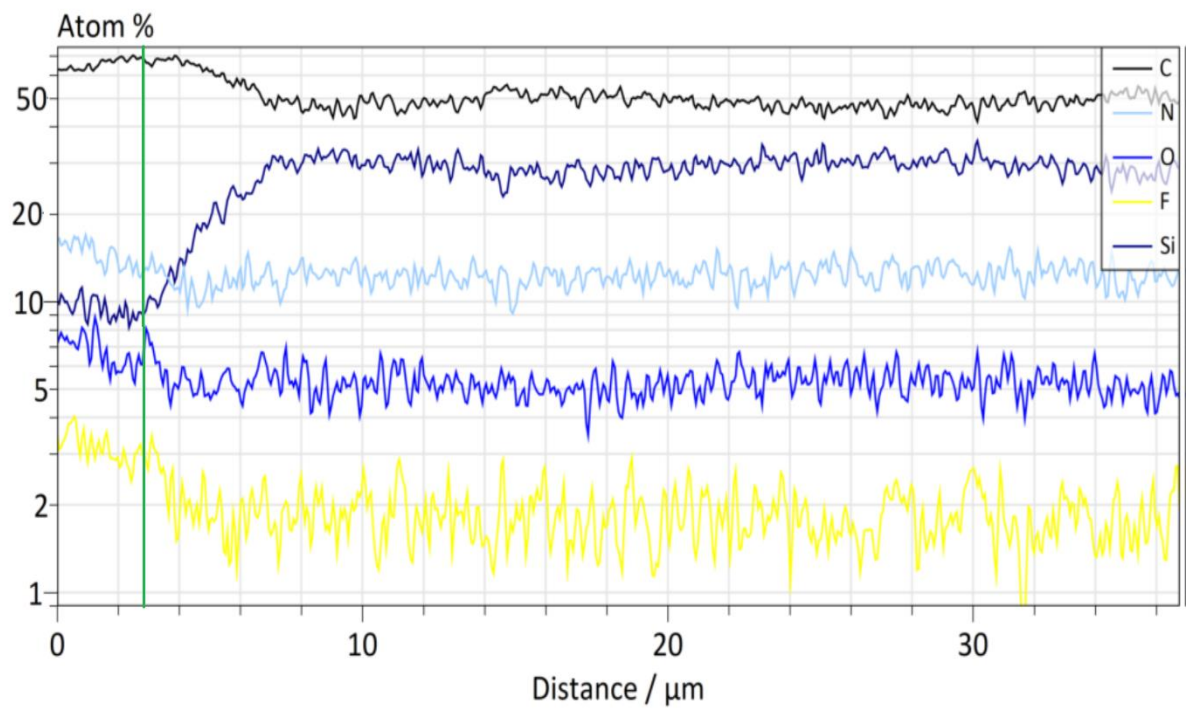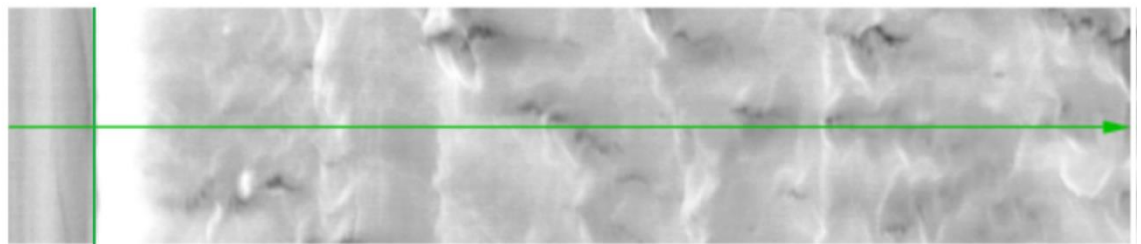

(a)

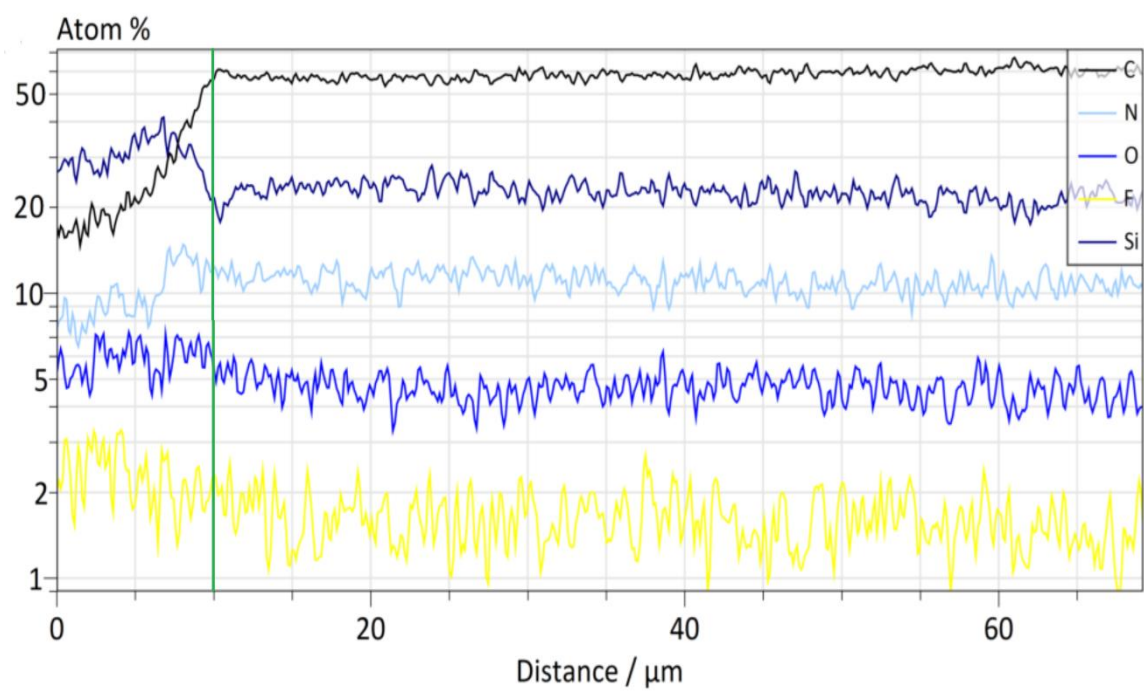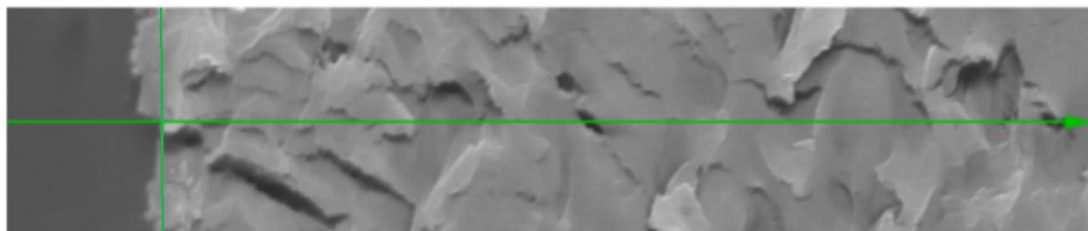

(b)

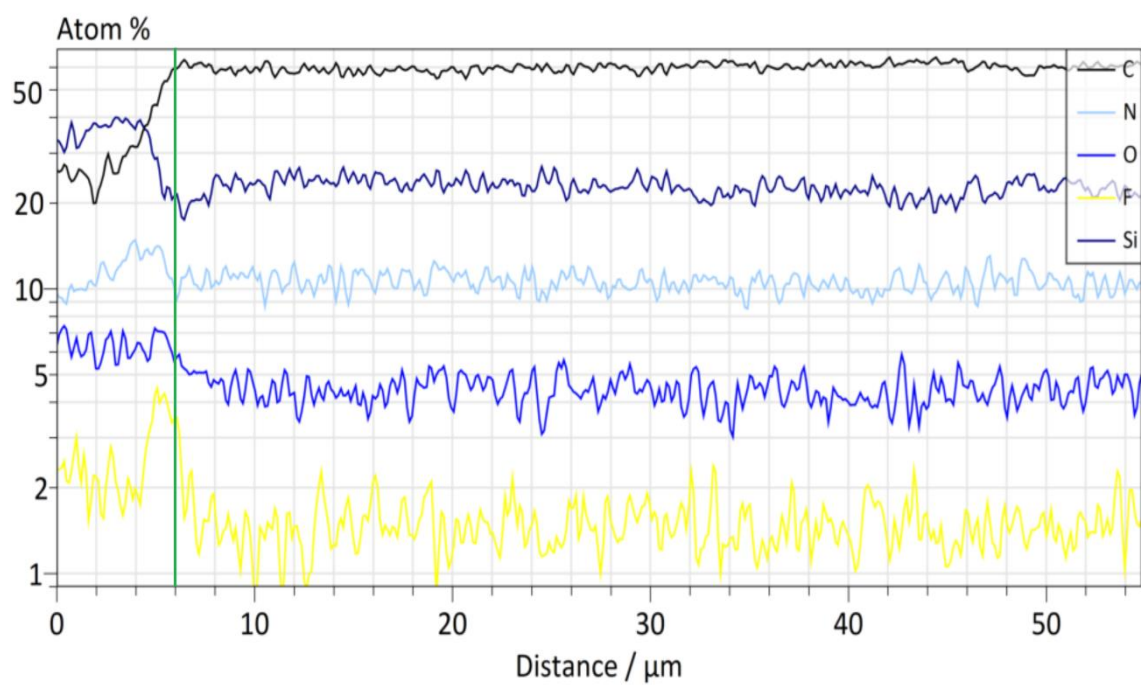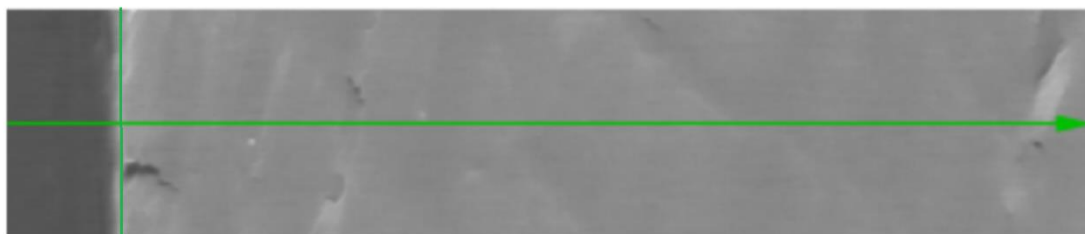

(c)

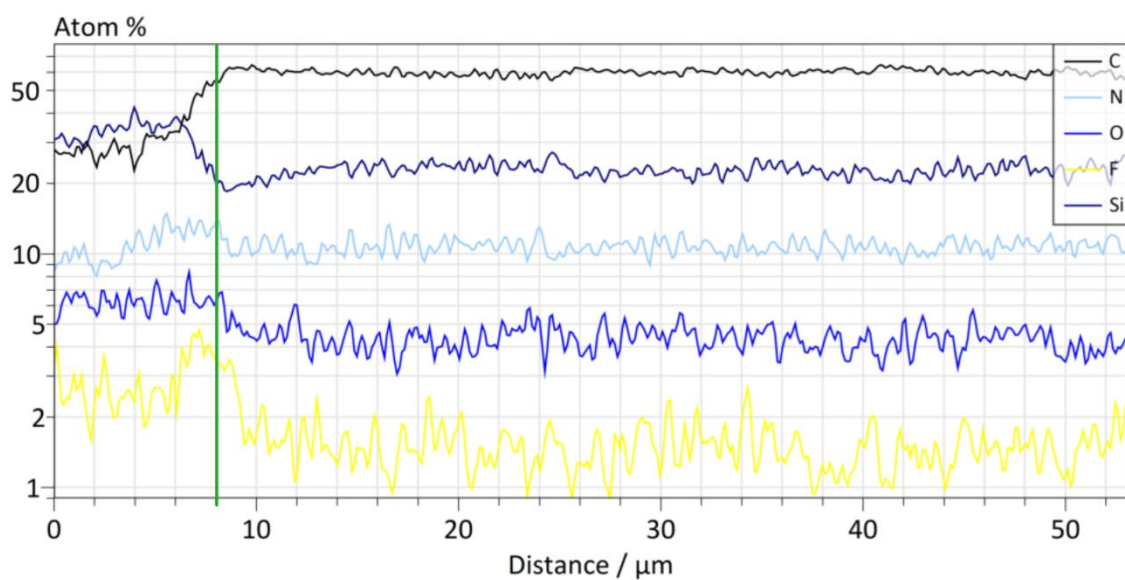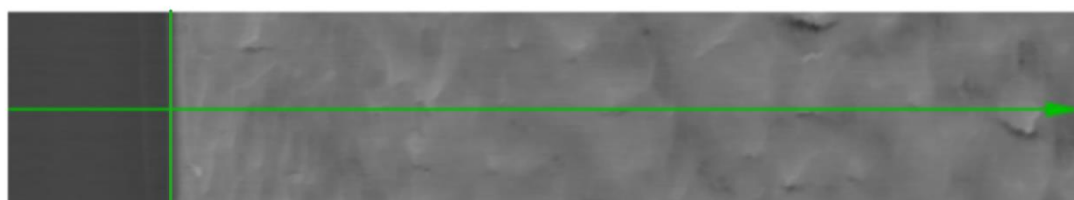

(d)

Figure S2. Curves of the atomic content of fluorine along the cross-section surfaces of the samples treated for 15 (a), 30 (b), 45 (c), and 60 (d) min. The vertical green lines correspond to the zero-depth surface of the fluorinated PVTMS samples
